# Supplementary material for: A Probabilistic Multicriteria Decision Analysis of Robot-Assisted versus Laparoscopic Sacrocolpopexy: A Secondary Analysis of Published Meta-analytic Data
Source: Research Square preprint supplement (doi:10.21203/rs.3.rs-8792464/v1), 2026-02-10
Supplement: Supplementary file 1 [file 712e9fc2063145923d53e549.docx]

#======================================================

# Appendix: R code for probabilistic multi-criteria decision analysis (MCDA)

#

# Data requirement:

# - An input data frame `dat` with one row per outcome and the following

# variables:

# Outcome : character label of the outcome

# Effect : pooled effect estimate (RASC − LSC for continuous outcomes;

# log(odds ratio) for binary outcomes)

# Lower : lower bound of the 95% CI on the same scale as Effect

# Upper : upper bound of the 95% CI on the same scale as Effect

# Domain : "resource", "safety", or "efficacy"

# Type : "continuous" or "binary"

# Direction : "lower_better" (lower values favor RASC)

# - All outcomes are coded so that lower values favor RASC

#======================================================

# ======================================================

# 1. Packages and data

#======================================================

library(tibble)

library(dplyr)

library(tidyr)

library(purrr)

dat <- dat %>%

mutate(

SE = (Upper - Lower) / 3.92,

mean = Effect

)

#=======================================================

# 2. Monte Carlo sampling of treatment effects

#=======================================================

n_out <- nrow(dat)

n_sim <- 200000

set.seed(1234)

draw_mat <- sapply(seq_len(n_out), function(j) {

rnorm(n_sim, mean = dat$mean[j], sd = dat$SE[j])

})

colnames(draw_mat) <- dat$Outcome

draw_mat <- t(draw_mat)

fav_mat <- draw_mat < 0 # TRUE = RASC better, FALSE = LSC better

# ======================================================

# 3. Estimated probability for each outcome

# Pr(RASC better) = proportion of draws favoring RASC

# ======================================================

fav_mat <- matrix(FALSE, nrow = n_out, ncol = n_sim)

rownames(fav_mat) <- dat$Outcome

for (j in seq_len(n_out)) {

if (dat$Direction[j] == "lower_better") {

fav_mat[j, ] <- (draw_mat[j, ] < 0)

} else if (dat$Direction[j] == "higher_better") {

fav_mat[j, ] <- (draw_mat[j, ] > 0)

}

}

res_pr <- tibble(

Outcome = dat$Outcome,

Pr_RASC_better = rowMeans(fav_mat)

)

print(res_pr)

#=======================================================

# 4. Outcome weights for each MCDA scenario

# =======================================================

n_res <- sum(dat$Domain == "resource")

n_saf <- sum(dat$Domain == "safety")

n_eff <- sum(dat$Domain == "efficacy")

w_dom_equal <- c(resource = 1/3, safety = 1/3, efficacy = 1/3)

w_dom_safety <- c(resource = 0.20, safety = 0.60, efficacy = 0.20)

w_dom_efficacy <- c(resource = 0.20, safety = 0.20, efficacy = 0.60)

w_dom_resource <- c(resource = 0.60, safety = 0.20, efficacy = 0.20)

dat <- dat %>%

mutate(

w_equal = case_when(

Domain == "resource" ~ w_dom_equal["resource"] / n_res,

Domain == "safety" ~ w_dom_equal["safety"] / n_saf,

Domain == "efficacy" ~ w_dom_equal["efficacy"] / n_eff

),

w_safety = case_when(

Domain == "resource" ~ w_dom_safety["resource"] / n_res,

Domain == "safety" ~ w_dom_safety["safety"] / n_saf,

Domain == "efficacy" ~ w_dom_safety["efficacy"] / n_eff

),

w_efficacy = case_when(

Domain == "resource" ~ w_dom_efficacy["resource"] / n_res,

Domain == "safety" ~ w_dom_efficacy["safety"] / n_saf,

Domain == "efficacy" ~ w_dom_efficacy["efficacy"] / n_eff

),

w_resource = case_when(

Domain == "resource" ~ w_dom_resource["resource"] / n_res,

Domain == "safety" ~ w_dom_resource["safety"] / n_saf,

Domain == "efficacy" ~ w_dom_resource["efficacy"] / n_eff

)

)

colSums(select(dat, starts_with("w_")))

#========================================================

# 5. MCDA scoring function

# ========================================================

run_scenario <- function(weight_vec, fav_mat) {

score <- as.numeric(t(weight_vec) %*% fav_mat) # length = n_sim

expected <- mean(score)

ui <- quantile(score, c(0.025, 0.975))

p_best <- mean(score > 0.5)

tibble(

expected = expected,

lower95 = ui[1],

upper95 = ui[2],

p_best = p_best

)

}

# ========================================================

# 6. Run MCDA under the four weighting scenarios

#========================================================

res_equal <- run_scenario(dat$w_equal, fav_mat) %>% mutate(scenario = "equal")

res_safety <- run_scenario(dat$w_safety, fav_mat) %>% mutate(scenario = "safety")

res_efficacy <- run_scenario(dat$w_efficacy, fav_mat) %>% mutate(scenario = "efficacy")

res_resource <- run_scenario(dat$w_resource, fav_mat) %>% mutate(scenario = "resource")

res_mcda <- bind_rows(res_equal, res_safety, res_efficacy, res_resource) %>%

select(scenario, expected, lower95, upper95, p_best)

print(res_mcda)

# ======================================================

# 7. Sensitivity analysis: ±20% perturbation (equal-weight baseline)

# ======================================================

w_base <- dat$w_equal

base_res <- run_scenario(w_base, fav_mat)

perturb_weight <- function(w_base, j, delta = 0.20) {

w_new <- w_base

w_new[j] <- w_new[j] * (1 + delta)

w_new <- w_new / sum(w_new)

w_new

}

pert_results <- lapply(seq_len(n_out), function(j) {

w_m20 <- perturb_weight(w_base, j, delta = -0.20)

w_p20 <- perturb_weight(w_base, j, delta = 0.20)

bind_rows(

run_scenario(w_m20, fav_mat) %>% mutate(perturb = "-20%"),

run_scenario(w_p20, fav_mat) %>% mutate(perturb = "+20%")

)

}) %>% bind_rows()

sens_summary <- tibble(

expected_min = min(pert_results$expected),

expected_max = max(pert_results$expected),

p_best_min = min(pert_results$p_best),

p_best_max = max(pert_results$p_best)

)

print(sens_summary)

#========================================================# End of script

#========================================================
